# Supplementary material for: Epidemiological changes in measles infections in southern China between 2009 and 2016: a retrospective database analysis
Source: Springer Nature journal article supplement (doi:10.1186/s12879-020-4919-x), 2020-03-06

Figure S1. Distribution of measles cases by month-age among  $\leq 8$  month old cases in each year

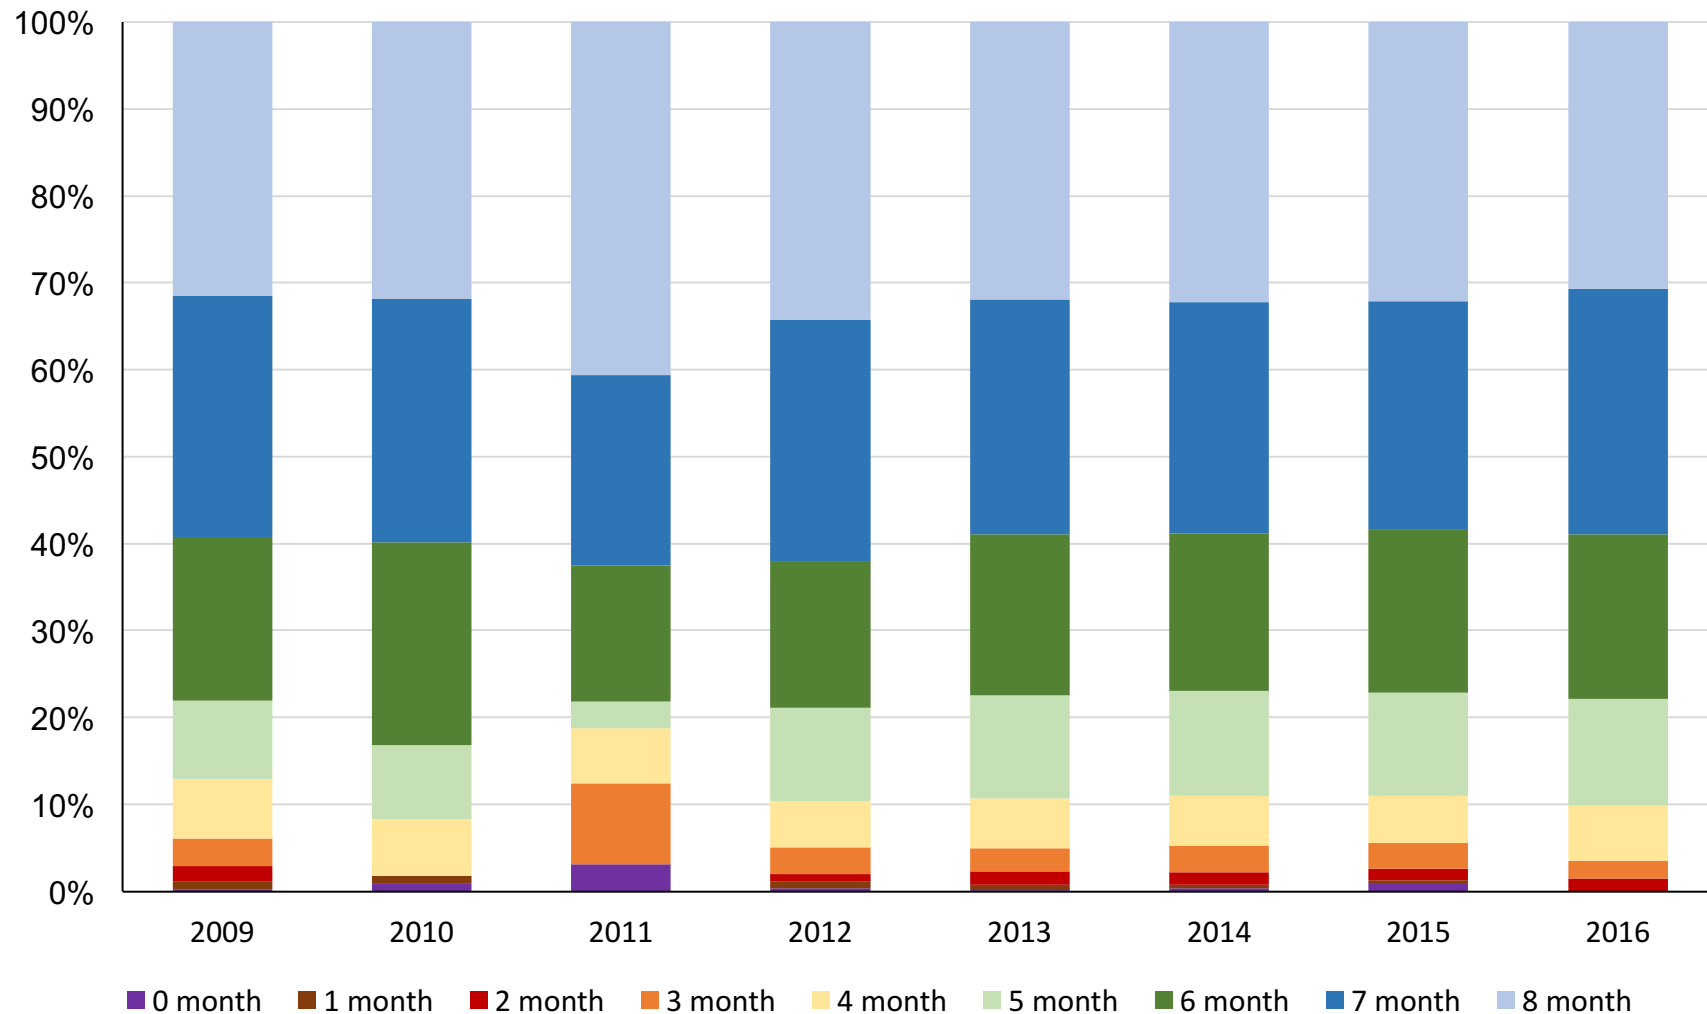

Supplement: MOESM1 [file 17777924]
